# Supplementary material for: Trends in Infant Mortality in United States: A Brief Study of the Southeastern States from 2005–2009
Source: PubMed Central journal article supplement (PMC4454945; doi:10.3390/ijerph120504908), 2015-05-06
Supplement: ijerph-12-04908-s001.pdf [file ijerph-12-04908-s001.pdf]

**Table S3.** Infant mortality and age of mother in the southeastern states and the entire country from 2005 to 2009.

| Age of Mother  | Average Infant Mortality (per 100,000) (2005–2009) |                   |                    |                    |                    |                  |
|----------------|----------------------------------------------------|-------------------|--------------------|--------------------|--------------------|------------------|
|                | Alabama                                            | Florida           | Georgia            | Louisiana          | Mississippi        | US               |
| Under 15 years | NA                                                 | 2898.55 *         | NA                 | NA                 | NA                 | 1585.19 ± 144.87 |
| 15–19 years    | 1230.82 ± 84.90 *                                  | 1051.73 ± 52.30 * | 1066.96 ± 100.13 * | 1265.36 ± 91.27 *  | 1238.47 ± 266.84 * | 961.11 ± 43.44   |
| 20–24 years    | 981.86 ± 88.43                                     | 800.54 ± 28.04    | 907.00 ± 128.81    | 973.02 ± 60.16     | 1148.18 ± 76.62 *  | 760.37 ± 16.43   |
| 25–29 years    | 812.11 ± 55.45                                     | 635.97 ± 21.34    | 709.95 ± 162.10    | 814.23 ± 77.87     | 899.41 ± 112.93 *  | 591.53 ± 11.51   |
| 30–34 years    | 772.65 ± 117.85                                    | 545.31 ± 22.06    | 615.97 ± 156.32    | 766.48 ± 88.39     | 794.68 ± 103.22    | 527.81 ± 16.02   |
| 35–39 years    | 885.00 ± 154.70 *                                  | 675.01 ± 59.07    | 686.74 ± 41.39     | 920.89 ± 139.24 *  | 1042.49 ± 210.04 * | 609.61 ± 16.01   |
| 40–44 years    | 1255.23 ± 236.30 *                                 | 841.39144.71      | 856.36 ± 254.49    | 1349.24 ± 178.19 * | 1824.82*           | 783.60 ± 31.10   |
| 45–49 years    | NA                                                 | NA                | NA                 | NA                 | NA                 | 1163.69 ± 155.53 |
| 50–54 years    | NA                                                 | NA                | NA                 | NA                 | NA                 | 1104.65 ± 112.53 |

\*  $p < 0.05$ , compared to the US.

**Table S4.** Comparison of significance in the correlation between the age of mother and infant mortality in the southeastern states.

| Age of Mother  | Significance Level |            |       |            |       |            |            |            |            |            |
|----------------|--------------------|------------|-------|------------|-------|------------|------------|------------|------------|------------|
|                | AL-FL              | AL-GA      | AL-LA | AL-MS      | FL-GA | FL-LA      | FL-MS      | GA-LA      | GA-MS      | LA-MS      |
| Under 15 years | NA                 | NA         | NA    | NA         | NA    | NA         | NA         | NA         | NA         | NA         |
| 15–19 years    | NS                 | NS         | NS    | NS         | NS    | NS         | NS         | NS         | NS         | NS         |
| 20–24 years    | NS                 | NS         | NS    | NS         | NS    | NS         | $P < 0.05$ | NS         | NS         | NS         |
| 25–29 years    | NS                 | NS         | NS    | NS         | NS    | NS         | NS         | NS         | NS         | NS         |
| 30–34 years    | NS                 | NS         | NS    | NS         | NS    | NS         | NS         | NS         | NS         | NS         |
| 35–39 years    | NS                 | NS         | NS    | NS         | NS    | NS         | $P < 0.05$ | NS         | $P < 0.05$ | NS         |
| 40–44 years    | $p < 0.05$         | $p < 0.05$ | NS    | $p < 0.05$ | NS    | $p < 0.05$ | $p < 0.05$ | $p < 0.05$ | $p < 0.05$ | $p < 0.05$ |

**Table S5.** Infant mortality and marital status in the southeastern states and the entire country from 2005 to 2009.

| Year      | State       | Average Infant Mortality (per 100,000) |                    |
|-----------|-------------|----------------------------------------|--------------------|
|           |             | Married                                | Unmarried          |
| 2005–2009 | Alabama     | 749.65 ± 99.77 *                       | 1204.28 ± 52.81 *  |
| 2005–2009 | Florida     | 524.51 ± 15.57                         | 944.72 ± 48.70     |
| 2005–2009 | Georgia     | 563.45 ± 31.88                         | 1083.70 ± 50.76 *  |
| 2005–2009 | Louisiana   | 677.06 ± 43.23 *                       | 1186.36 ± 81.02 *  |
| 2005–2009 | Mississippi | 707.18 ± 63.06 *                       | 1341.70 ± 164.46 * |
| 2005–2009 | US          | 509.24 ± 14.05                         | 908.35 ± 38.52     |

\*  $p < 0.05$ , compared to the US.

**Table S6.** Comparison of significance in the correlation between marital status and infant mortality in the southeastern states.

| Marital Status | Significance Level |            |       |            |            |            |            |            |            |            |
|----------------|--------------------|------------|-------|------------|------------|------------|------------|------------|------------|------------|
|                | AL-FL              | AL-GA      | AL-LA | AL-MS      | FL-GA      | FL-LA      | FL-MS      | GA-LA      | GA-MS      | LA-MS      |
| Married        | $p < 0.05$         | $p < 0.05$ | NS    | NS         | NS         | $p < 0.05$ | $p < 0.05$ | $p < 0.05$ | $p < 0.05$ | NS         |
| Unmarried      | $p < 0.05$         | $p < 0.05$ | NS    | $p < 0.05$ | $p < 0.05$ | $p < 0.05$ | $p < 0.05$ | $p < 0.05$ | $p < 0.05$ | $p < 0.05$ |

**Table S7.** Infant mortality with respect to race in the southeastern us from 2005 to 2009.

| States  | Year      | Race                      | Demographics | Infant Mortality (per 100,000) | Differences Compare to Black Race | Significance Compare to Black Race ( $\alpha = 0.05$ ) |
|---------|-----------|---------------------------|--------------|--------------------------------|-----------------------------------|--------------------------------------------------------|
| Alabama | 2005–2009 | Black or African American | 26.5%        | 1367.87 ± 74.72                |                                   |                                                        |
|         | 2005–2009 | White                     | 70.0%        | 735.30 ± 72.62                 | 186%                              | $p < 0.05$                                             |
| Florida | 2005–2009 | Asian or Pacific Islander | 2.7%         | 535.45 ± 87.41                 | 230%                              | $p < 0.05$                                             |
|         | 2005–2009 | Black or African American | 78.3%        | 1228.94 ± 19.02                |                                   |                                                        |
|         | 2005–2009 | White                     | 16.6%        | 548.34 ± 22.58                 | 224%                              | $p < 0.05$                                             |
| Georgia | 2005–2009 | Asian or Pacific Islander | 3.5%         | 469.81 ± 172.40                | 260%                              | $p < 0.05$                                             |
|         | 2005–2009 | Black or African American | 31.2%        | 1222.05 ± 66.74                |                                   |                                                        |
|         | 2005–2009 | White                     | 62.8%        | 565.99 ± 23.85                 | 216%                              | $p < 0.05$                                             |

**Table S7. Cont.**

| States      | Year      | Race                      | Demographics | Infant Mortality (per 100,000) | Differences Compare to Black Race | Significance Compare to Black Race ( $\alpha = 0.05$ ) |
|-------------|-----------|---------------------------|--------------|--------------------------------|-----------------------------------|--------------------------------------------------------|
| Louisiana   | 2005–2009 | Black or African American | 32.4%        | 1358.93 ± 146.48               |                                   |                                                        |
|             | 2005–2009 | White                     | 63.7%        | 662.84 ± 44.34                 | 205%                              | $p < 0.05$                                             |
| Mississippi | 2005–2009 | Black or African American | 37.4%        | 1438.27 ± 161.62               |                                   |                                                        |
|             | 2005–2009 | White                     | 59.9%        | 707.55 ± 33.27                 | 203%                              | $p < 0.05$                                             |
|             | 2005–2009 | Asian or Pacific Islander | 5.1%         | 462.592 ± 19.94178             | 275%                              | $p < 0.05$                                             |
| US          | 2005–2009 | Black or African American | 13.1%        | 1271.324 ± 45.90073            |                                   |                                                        |
|             | 2005–2009 | White                     | 77.9%        | 556.168 ± 14.44635             | 229%                              | $p < 0.05$                                             |

**Table S8.** Comparison of the significance between race and infant mortality in the southeastern states.

| Race                      | Significance Level |       |       |       |       |            |            |            |            |       |
|---------------------------|--------------------|-------|-------|-------|-------|------------|------------|------------|------------|-------|
|                           | AL-FL              | AL-GA | AL-LA | AL-MS | FL-GA | FL-LA      | FL-MS      | GA-LA      | GA-MS      | LA-MS |
| Asian or Pacific Islander | NA                 | NA    | NA    | NA    | NS    | $p < 0.05$ | NA         | $p < 0.05$ | NA         | NA    |
| Black or African American | NS                 | NS    | NS    | NS    | NS    | NS         | $p < 0.05$ | NS         | $p < 0.05$ | NS    |
| White                     | NS                 | NS    | NS    | NS    | NS    | NS         | NS         | NS         | NS         | NS    |

**Table S9.** Differences in infant mortality by maternal education in the southeastern us from 2005 to 2009.

| Maternal Education                     | Average Infant Mortality (per 100,000) (2005–2009) |                |                 |                    |                    |                |
|----------------------------------------|----------------------------------------------------|----------------|-----------------|--------------------|--------------------|----------------|
|                                        | Alabama                                            | Florida        | Georgia         | Louisiana          | Mississippi        | US             |
| 8th grade or less                      | 940.17 ± 77.34 *                                   | 765.06 ± 64.63 | 617.83 ± 57.46  | 1401.98 ± 393.01 * | 1309.19 ± 80.30 *  | 644.98 ± 25.85 |
| 9th through 12th grade with no diploma | 1133.75 ± 64.76                                    | 944.30 ± 22.46 | 1010.00 ± 42.75 | 1288.84 ± 129.26 * | 1630.58 ± 175.70 * | 879.61 ± 59.91 |
| High school graduate or GED completed  | 1065.47 ± 32.37 *                                  | 812.08 ± 17.75 | 884.66 ± 70.10  | 1115.23 ± 20.92 *  | 1070.48 ± 45.42 *  | 756.45 ± 53.72 |
| Some college credit, but not a degree  | 874.29 ± 53.64 *                                   | 622.86 ± 11.29 | 742.85 ± 37.78  | 828.26 ± 11.13     | 880.86 ± 117.86 *  | 603.01 ± 7.23  |
| College or higher                      | 549.92 ± 101.48                                    | 480.51 ± 47.84 | 487.68 ± 94.06  | 613.62 ± 56.26     | 735.80 ± 11.39 *   | 407.96 ± 9.26  |

\*  $p < 0.05$ , compared to the US.

**Table S10.** Comparison of the significance between maternal education and infant mortality in the southeastern states.

| Maternal Education                     | Significance Level |            |            |            |       |            |            |            |            |            |
|----------------------------------------|--------------------|------------|------------|------------|-------|------------|------------|------------|------------|------------|
|                                        | AL-FL              | AL-GA      | AL-LA      | AL-MS      | FL-GA | FL-LA      | FL-MS      | GA-LA      | GA-MS      | LA-MS      |
| 8th grade or less                      | NS                 | $p < 0.05$ | $p < 0.05$ | $p < 0.05$ | NS    | $p < 0.05$ | $p < 0.05$ | $p < 0.05$ | $p < 0.05$ | NS         |
| 9th through 12th grade with no diploma | NS                 | NS         | NS         | $p < 0.05$ | NS    | $p < 0.05$ | $p < 0.05$ | NS         | $p < 0.05$ | $p < 0.05$ |
| High school graduate or GED completed  | NS                 | NS         | NS         | NS         | NS    | $P < 0.05$ | NS         | NS         | NS         | NS         |
| Some college credit, but not a degree  | NS                 | NS         | NS         | NS         | NS    | NS         | NS         | NS         | NS         | NS         |
| College or higher                      | NS                 | NS         | NS         | NS         | NS    | NS         | NS         | NS         | NS         | NS         |

**Table S11.** Comparison of the significance between the month prenatal care began and infant mortality in the southeastern states.

| Month Prenatal Care Began | Significance Level |       |       |            |       |       |            |       |            |       |
|---------------------------|--------------------|-------|-------|------------|-------|-------|------------|-------|------------|-------|
|                           | AL-FL              | AL-GA | AL-LA | AL-MS      | FL-GA | FL-LA | FL-MS      | GA-LA | GA-MS      | LA-MS |
| No prenatal care          | NS                 | NS    | NS    | $p < 0.05$ | NS    | NS    | $p < 0.05$ | NS    | $p < 0.05$ | NS    |
| 1st month                 | NS                 | NS    | NS    | NS         | NS    | NS    | <b>NS</b>  | NS    | NS         | NS    |
| 2nd month                 | NS                 | NS    | NS    | NS         | NS    | NS    | NS         | NS    | NS         | NS    |
| 3rd month                 | NS                 | NS    | NS    | NS         | NS    | NS    | NS         | NS    | NS         | NS    |
| 4th month                 | NS                 | NS    | NS    | NS         | NS    | NS    | NS         | NS    | NS         | NS    |
| 5th month                 | NS                 | NS    | NS    | NS         | NS    | NS    | NS         | NS    | NS         | NS    |
| 6th month                 | NS                 | NS    | NS    | NS         | NS    | NS    | NS         | NS    | NS         | NS    |
| 7th month                 | NS                 | NS    | NA    | NA         | NS    | NA    | NA         | NA    | NA         | NA    |

**Table S12.** Comparison of the significance between birth weight and infant mortality in the southeastern states.

| Birth Weight (Grams) | Significance Level |            |            |       |            |            |       |            |            |            |
|----------------------|--------------------|------------|------------|-------|------------|------------|-------|------------|------------|------------|
|                      | AL-FL              | AL-GA      | AL-LA      | AL-MS | FL-GA      | FL-LA      | FL-MS | GA-LA      | GA-MS      | LA-MS      |
| 499 or less          | NS                 | $p < 0.05$ | $p < 0.05$ | NS    | $p < 0.05$ | $p < 0.05$ | NS    | $p < 0.05$ | $p < 0.05$ | $p < 0.05$ |
| 500–999              | NS                 | NS         | NS         | NS    | NS         | NS         | NS    | NS         | NS         | $p < 0.05$ |
| 1000–1499            | NS                 | NS         | NS         | NS    | NS         | NS         | NS    | NS         | NS         | NS         |
| 1500–1999            | NS                 | NS         | NS         | NS    | NS         | NS         | NS    | NS         | NS         | NS         |
| 2000–2499            | NS                 | NS         | NS         | NS    | NS         | NS         | NS    | NS         | NS         | NS         |
| 2500–2999            | NS                 | NS         | NS         | NS    | NS         | NS         | NS    | NS         | NS         | NS         |
| 3000–3499            | NS                 | NS         | NS         | NS    | NS         | NS         | NS    | NS         | NS         | NS         |
| 3500–3999            | NS                 | NS         | NS         | NS    | NS         | NS         | NS    | NS         | NS         | NS         |
| 4000–4499            | NA                 | NA         | NA         | NA    | NS         | NA         | NA    | NA         | NS         | NA         |

**Table S13.** Differences in infant mortality by the age of infant at death in the southeastern us from 2005 to 2009.

| Age of Infant at Death                  | Average Infant Mortality (per 100,000) (2005–2009) |                  |                |                  |                  |                  |               |
|-----------------------------------------|----------------------------------------------------|------------------|----------------|------------------|------------------|------------------|---------------|
|                                         | Alabama                                            | Florida          | Georgia        | Louisiana        | Mississippi      | US               |               |
| Neonatal deaths                         | Under 1 h                                          | 130.18 ± 7.00    | 99.84 ± 5.42   | 106.83 ± 11.94   | 86.74 ± 18.15    | 121.36 ± 21.72   | 96.61 ± 3.35  |
|                                         | 1–23 h                                             | 189.53 ± 27.80   | 168.38 ± 8.89  | 184.56 ± 13.49   | 226.08 ± 25.63 * | 233.96 ± 9.76 *  | 168.55 ± 4.67 |
|                                         | 1–6 days                                           | 117.45 ± 26.23   | 87.37 ± 9.09   | 108.94 ± 8.13    | 104.86 ± 13.49   | 118.62 ± 9.90    | 84.19 ± 4.28  |
|                                         | 7–27 days                                          | 138.32 ± 14.21 * | 101.81 ± 9.79  | 118.16 ± 9.45    | 122.32 ± 10.64   | 149.59 ± 13.98 * | 88.61 ± 3.72  |
| Postneonatal deaths                     | 28–364 days                                        | 348.32 ± 24.10 * | 257.89 ± 11.85 | 271.01 ± 19.13 * | 396.93 ± 27.36 * | 416.72 ± 31.67 * | 228.01 ± 5.78 |
| Declines for neonatal mortality (%)     |                                                    | 13.13            | 1.57           | 8.48             | 7.62             | 9.47             | 7.93          |
| Declines for postneonatal mortality (%) |                                                    | 13.17            | 10.27          | 10.48            | 13.94            | 15.51            | 4.54          |

\*  $p < 0.05$ , compared to the US.

**Table S14.** Comparison of the significance between age of infant at death and infant mortality in the southeastern states.

| Age Of Infant At Death | Significance Level |            |            |            |       |            |            |            |            |       |
|------------------------|--------------------|------------|------------|------------|-------|------------|------------|------------|------------|-------|
|                        | AL-FL              | AL-GA      | AL-LA      | AL-MS      | FL-GA | FL-LA      | FL-MS      | GA-LA      | GA-MS      | LA-MS |
|                        | Under 1 h          | NS         | NS         | $p < 0.05$ | NS    | NS         | NS         | NS         | NS         | NS    |
| 1–23 h                 | NS                 | NS         | NS         | $p < 0.05$ | NS    | $p < 0.05$ | $p < 0.05$ | $p < 0.05$ | $p < 0.05$ | NS    |
| 1–6 days               | NS                 | NS         | NS         | NS         | NS    | NS         | NS         | NS         | NS         | NS    |
| 7–27 days              | NS                 | NS         | NS         | NS         | NS    | NS         | $P < 0.05$ | NS         | NS         | NS    |
| 28–364 days            | $p < 0.05$         | $p < 0.05$ | $p < 0.05$ | $p < 0.05$ | NS    | $p < 0.05$ | $p < 0.05$ | $p < 0.05$ | $p < 0.05$ | NS    |

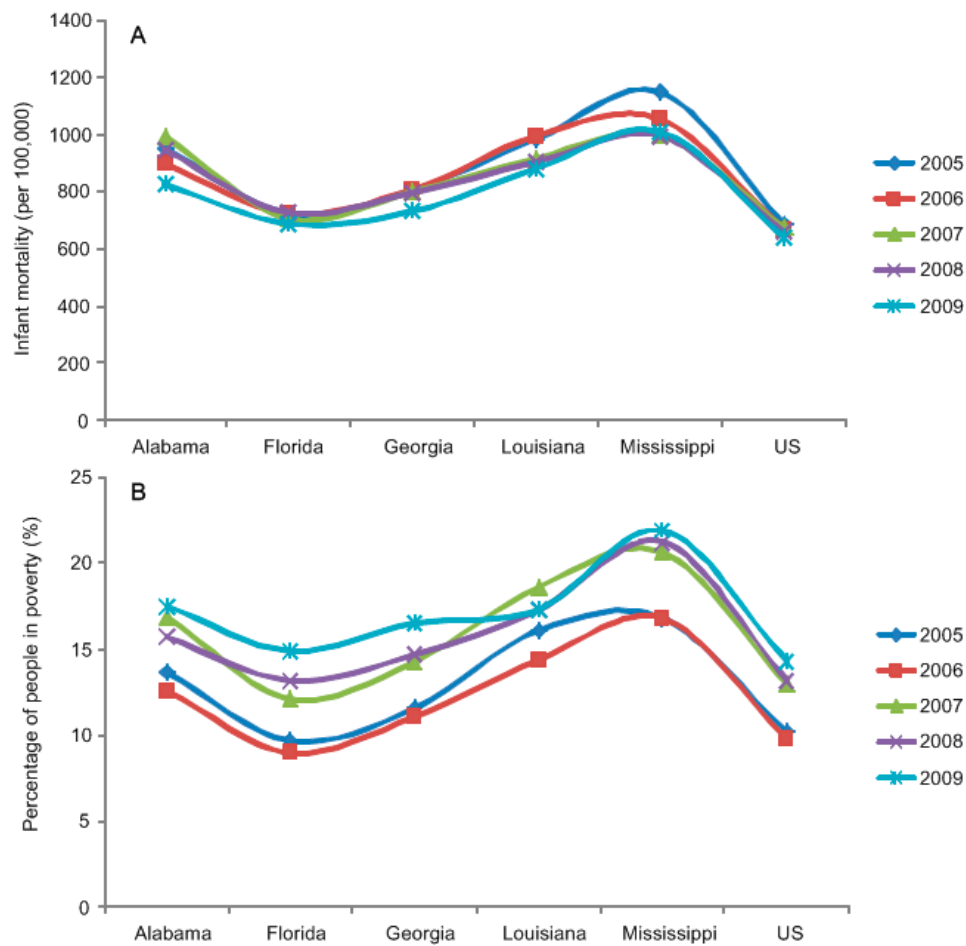

**Figure S1.** Trends of infant mortality (A) and poverty level (B) in the southeastern US from 2005–2009.

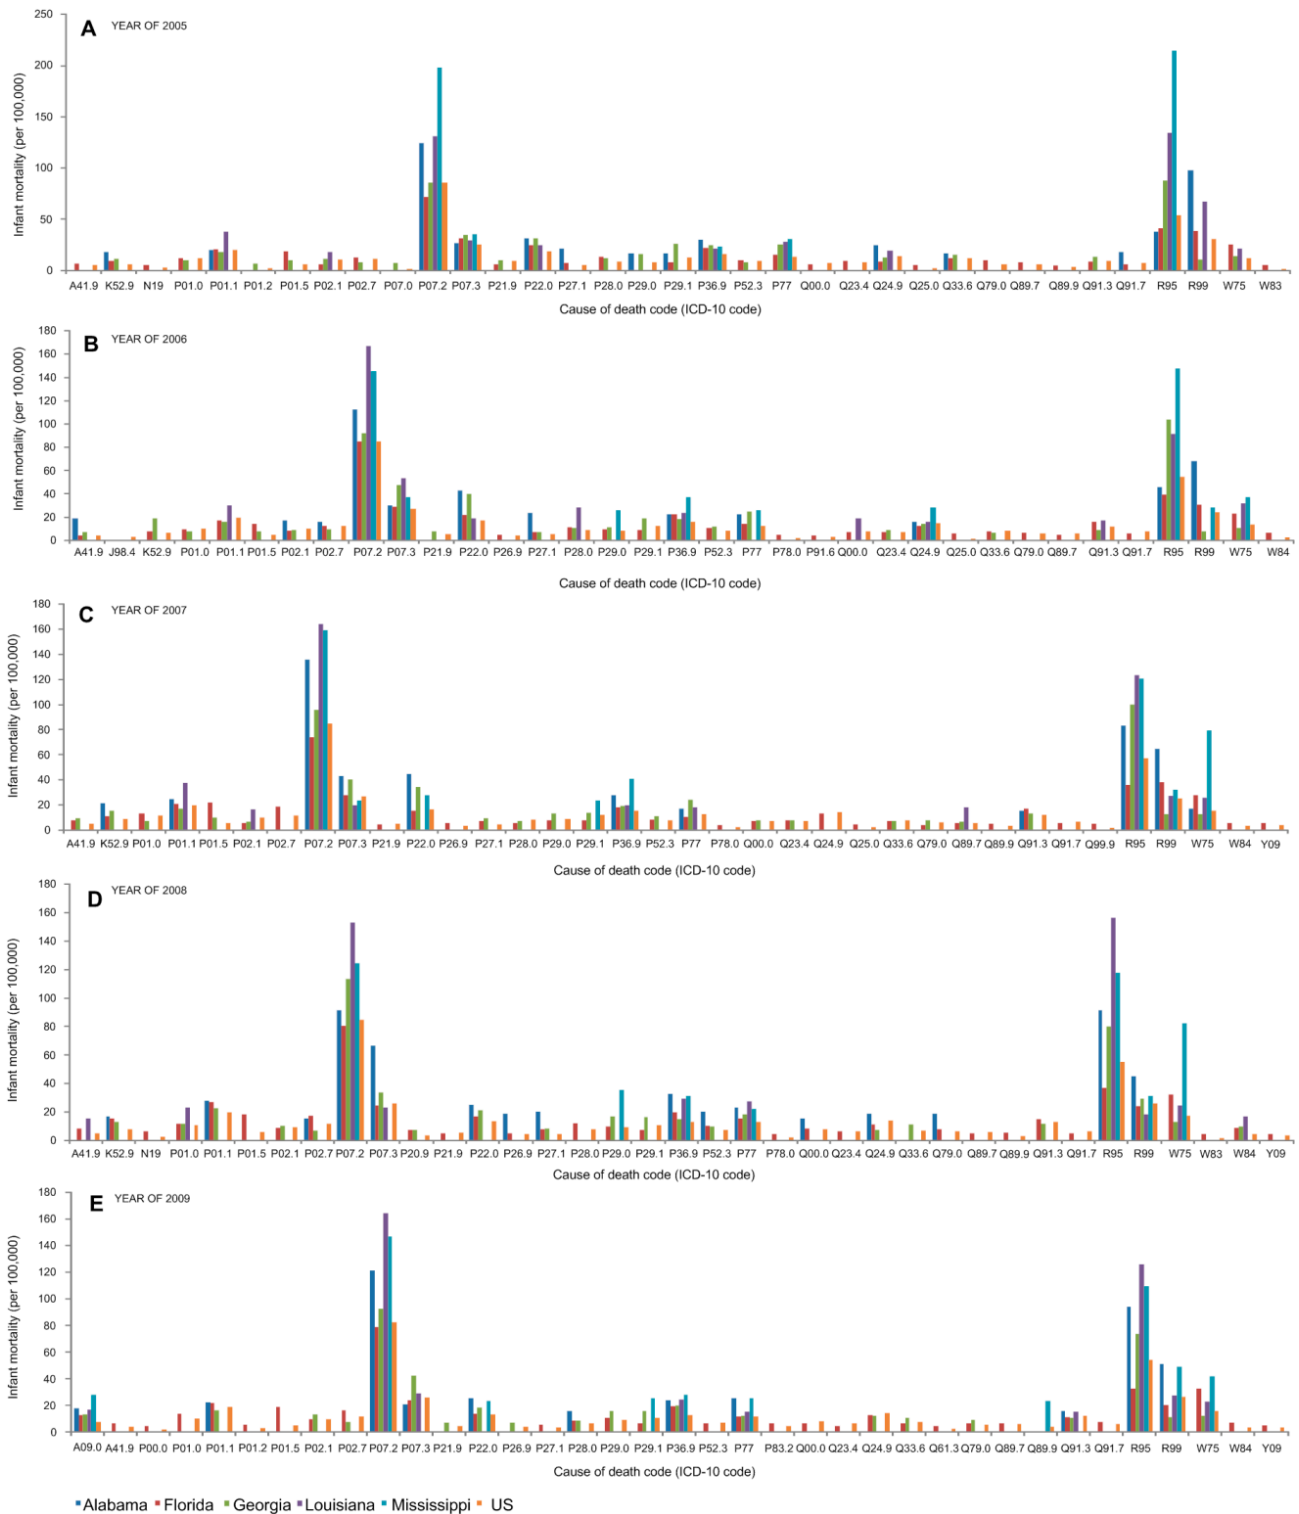

**Figure S2.** Causes of infant mortality in the southeastern US from 2005 (A) to 2009 (E). The six leading causes are: P07.2 (Extreme immaturity), R95 (Sudden infant death syndrome), R99 (Other ill-defined and unspecified causes of mortality), P07.3 (Other preterm infants), W75 (Accidental suffocation and strangulation in bed), P22.0 (Respiratory distress syndrome of newborn).



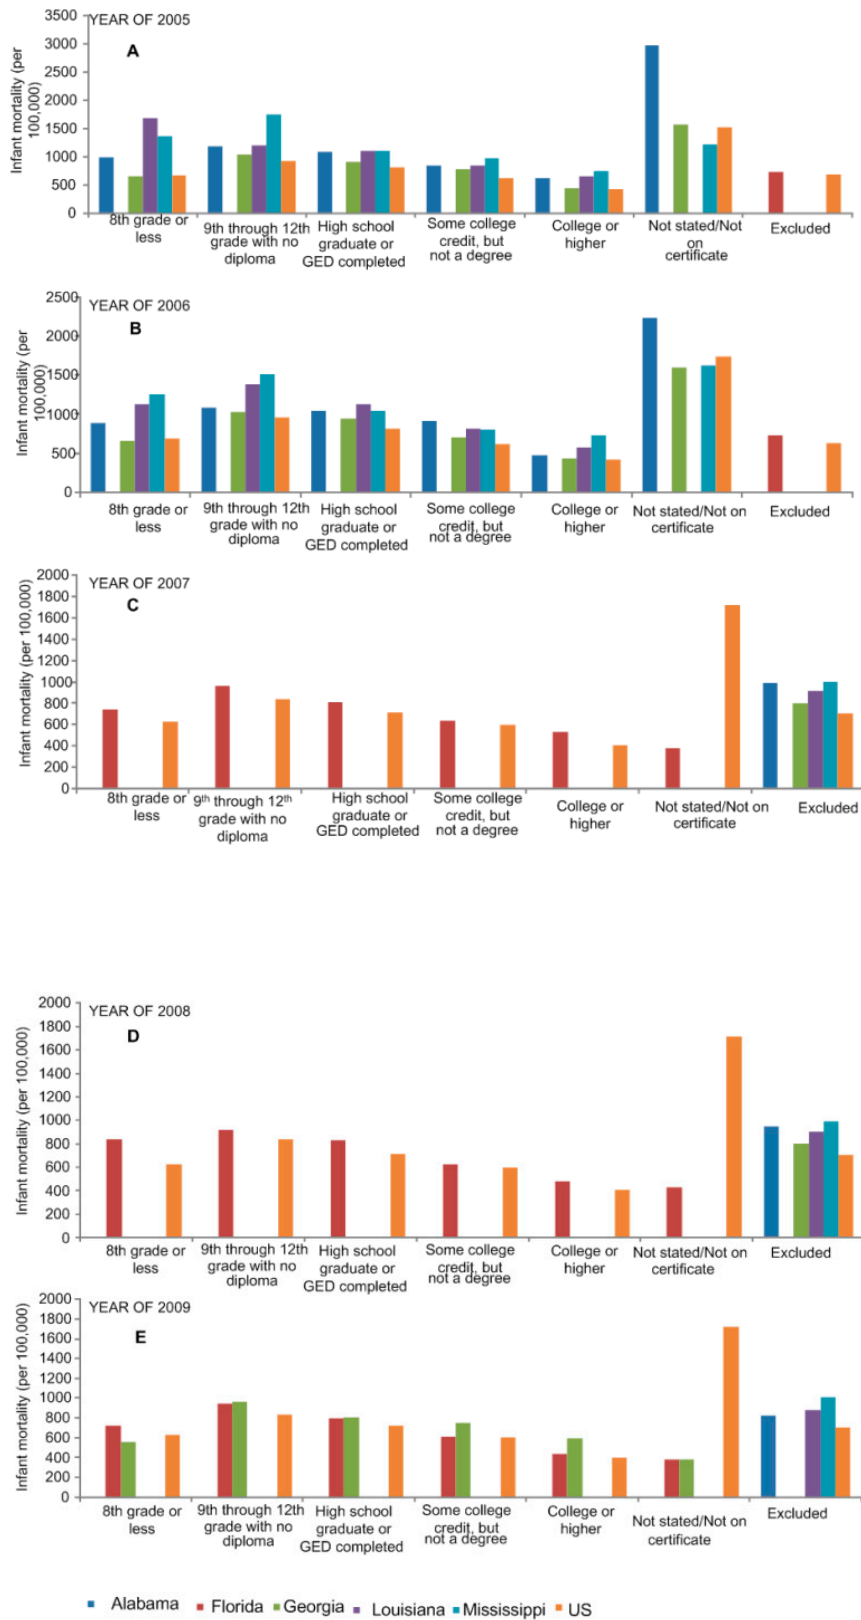

**Figure S3.** Correlation between infant mortality and maternal education in the southeastern US from 2005 (A) to 2009 (E).

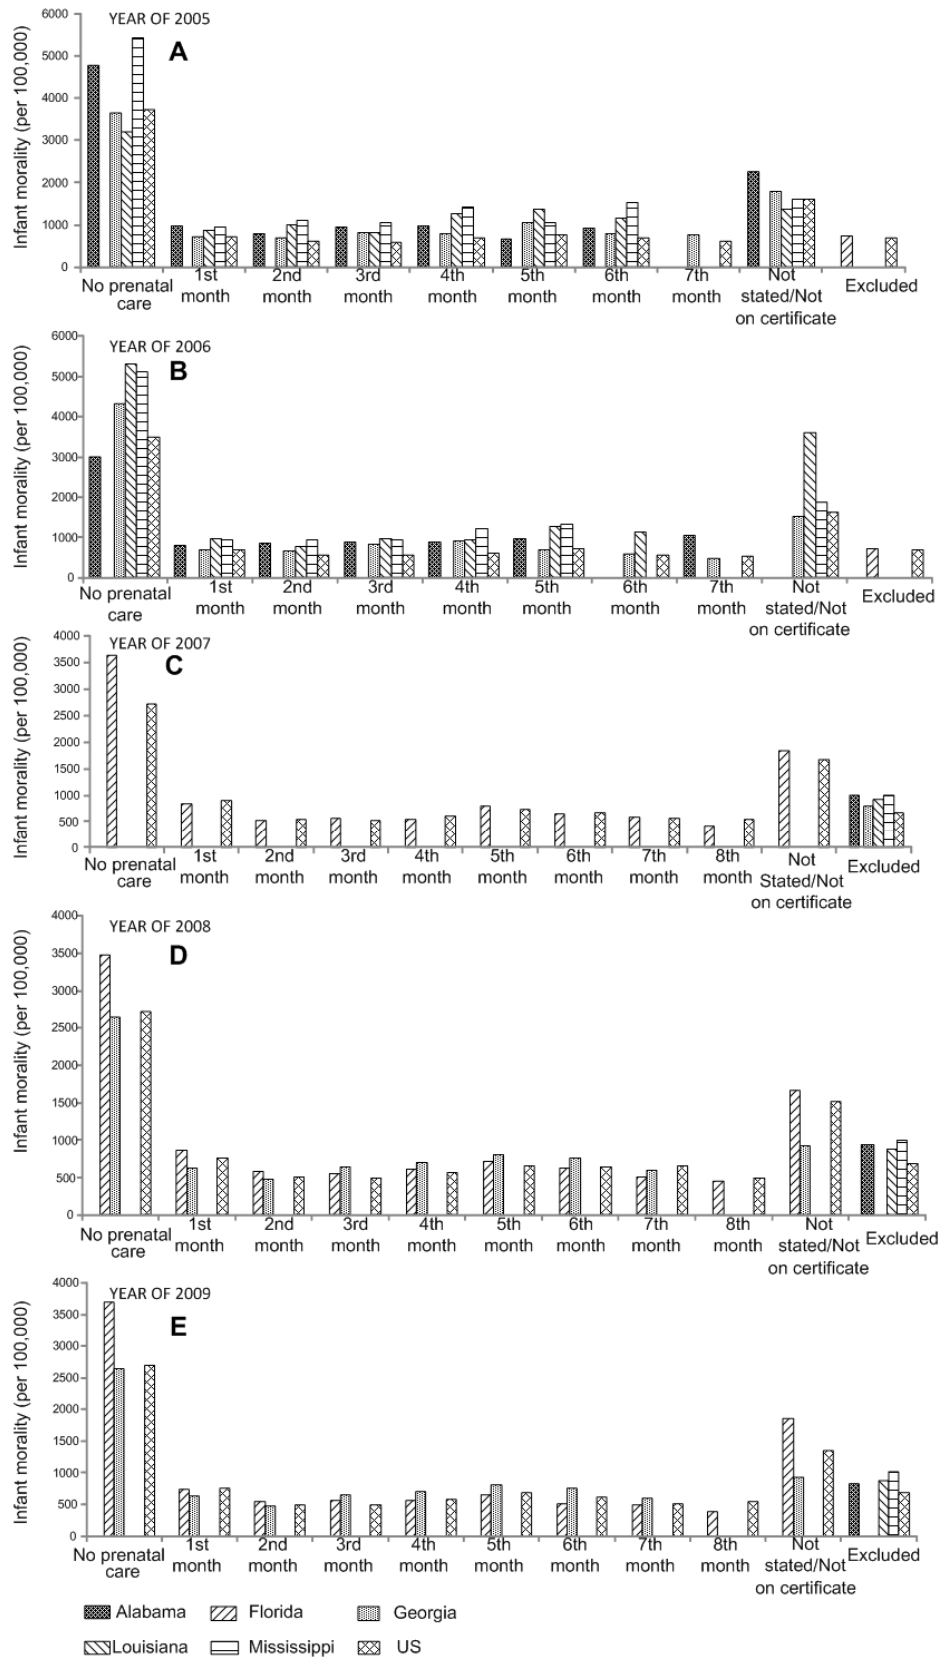

**Figure S4.** Analysis of variance shows the significant difference in infant mortality by the month of prenatal care began in the southeastern US from 2005 (A) to 2009 (E).

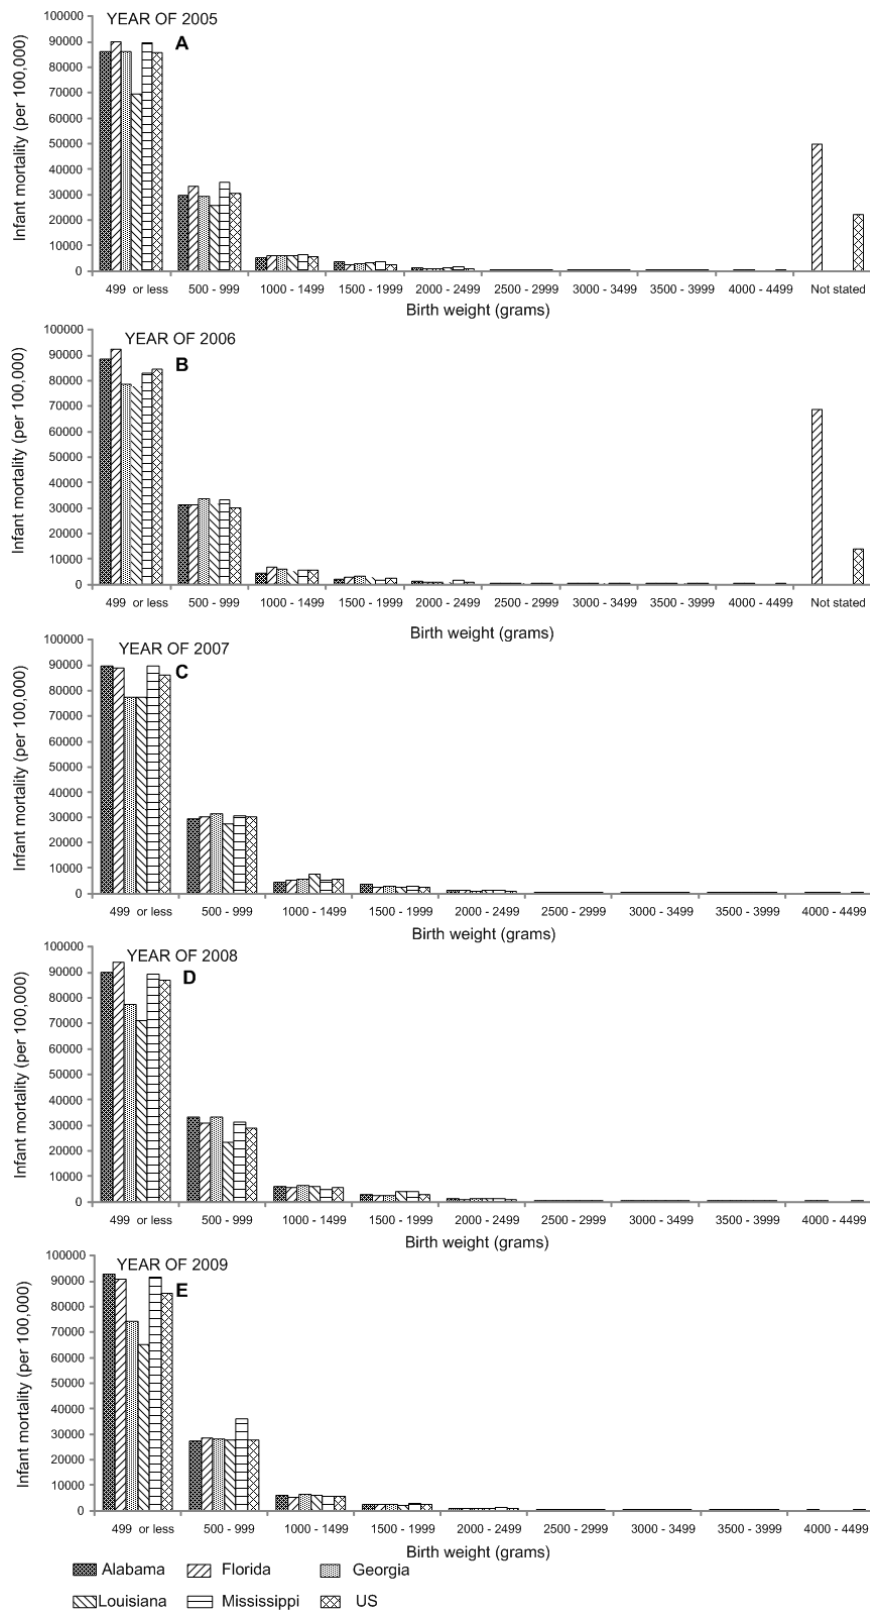

**Figure S5.** Analysis of variance shows the significant difference in infant mortality by the birth weight in the southeastern US from 2005 (A) to 2009 (E).
